# Supplementary material for: Post-wildfire sediment source and transport modeling, empirical observations, and applied mitigation: an Arizona USA case study
Source: Copernicus journal article supplement (doi:10.5194/egusphere-2023-2163), 2023-11-23
Supplement: Supplementary file [file egusphere-2023-2163-AC2-supplement.pdf]

## Response to Reviewer #1, January 18<sup>th</sup>, 2024

**We would like to thank this anonymous reviewer for their feedback, the comments have led to a greatly improved manuscript. Below are the reviewer's comments in regular type and our responses in bold type.**

### General Comments

This is a manuscript that describes several modeling approaches to estimate postfire sediment yields. They compare these yields with anecdotal data (photographs) and truck records that are subsequently used to estimate a sedimentation rate. The figures are generally clear, although somewhat repetitive, and thus there is an opportunity to reduce the current figures. The writing is generally clear, but some methodological details are missing, and some information is not well introduced in the paper (e.g., mention of the Pipeline fire) prior to the discussion.

I have several major suggestions to help improve the structure and clarity of this manuscript. The first suggestion is to better describe the type of model that you are using. Model is a vague term and can mean anything from a process-based numerical model to an empirical equation. Since many of these are previously published you don't need to get into all of the details, but I think you should describe the model type, the inputs, the parameters that you adjust, and the functional relationships. As far as functional relationships, that would mean that if, for example, you model deposition, then you say the key equation/method in which deposition is controlled.

**The model types are explained in more detail in this revision. However, the reviewer does correctly point out that there is abundant existing literature on the individual models. The purpose of this manuscript is not to introduce new modeling techniques but to compare existing models between themselves and empirical results. Adding too much detail about each modeling technique would detract from the purpose of this manuscript.**

Second, I think that the comparison between model output and observations could be clarified. Try adding a figure that shows a timeline of events that occurred. And then refer to the timeline when you say what you are modeling and how you are comparing models to observations. Right now this is confusing. In section 4.2.1 you are modeling four flood events, but were there more storms than that? Were those just the four largest storms? In addition to the timeline, I think you need to have some sort of figure that shows rain events as a function of time in the study. It is not always clear how what subset of postfire time you are comparing to the model.

**More description of the flood events (there were four) is provided in this revision. We could provide a timeline but that would be redundant with the explanation of events and the modeling domains. A new subsection, 2.1, was added to provide more clarity.**

Finally, organizationally, there are a few items that don't make sense. You start talking about the Pipeline fire in the discussion, but it wasn't mentioned prior to that in the study site section. Why do you model 4 events in 4.2.1 and three events in 4.2.2. How do the subwatersheds highlighted in figure 5 relate to "work areas" in Table 3? Should work areas be a single point rather than a watershed? And if not, then I think you need to state that a work area is a full subwatershed. And there could be an overall improvement of descriptions. For example, in the caption for Figure 10 it says "note the spread of flow and subsequent drop in water velocity", however you are not actually showing anything that indicates velocity. Other examples can be seen in the specific line comments below.

**These are good comments and are addressed in the line comments (which are the same as the paragraph above). Figure 10 has been updated to include a velocity map.**

### **Line Comments**

1. Here you use "post-wildfire" but on line 50 you write "post-fire". Try to use a consistent term throughout the manuscript.

**We have replaced "post-fire" with "post-wildfire" throughout the manuscript, thank you for catching that discrepancy.**

1. Paradise/sunnyside is not shown on the map in figure 1. Only Paradise is shown. Can you fix this?

**This is fixed in this iteration of the manuscript, thank you for catching that omission.**

1. Add a reference at the end of this sentence to support the statement

**Unsure which sentence, missing a reference to the line number in this comment form.**

1. after the word "debris" can you reference a news article to support this?

## A link to the NOAA webpage for the flood events

(<https://www.weather.gov/fgz/FlagstaffJuly2021>) is now included.

1. when you say “increase in runoff” what is the baseline for the increase?

**“Surface water” has been added for clarity. The basis for the modeling and empirical observations of flooding are provided in the reference in the sentence (Schenk et al. 2023).**

113-114. When you say that the watershed was divided into sub-watersheds, say the criteria you used for the watershed delineation.

**“Based on USGS National Hydrography Dataset” has been added. With a citation of: USGS, (U.S. Geological Survey), 2019, USGS 3D Elevation Program Digital Elevation Model, accessed October 31<sup>st</sup>, 2021**

1. Sentence ending on 127, support claim with a reference.

**More description of the highly heterogeneous rainfall distribution in the American Southwest was added to this sentence.**

128-139: Why is this paragraph not in section 3.4?

**This can be explained either in the Sediment Modeling section or the Sediment Yield section, providing the method twice is redundant.**

1. I think you need to add some details to explain how “an analysis of sediment transport across a conceptualized design channel” was done. This is really vague.

**We took cross sections in their condition at our proposed fan work areas and modeled them as 2% consistent grade as a proposed condition. We compared the modeled cross section with the current 2021 condition.**

1. Say how these data are used to estimate bank erosion. What is the method?

**Bank erosion was quantified in the field in 2021 and estimated in out-years using channel slope, expected annual flow rates (from FLO-2D modeling completed outside of this study; Schenk et al. 2023), soil condition, and channel cross-sectional area.**

185: I think you mean model instead of modeled

**Thank you, corrected.**

189: State explicitly why you considered 2021 as the second year post fire.

**The fire began during the monsoon season of 2019 which would make 2020 the first full year post-fire.**

Say why you chose one inch, two inch, and three inch precipitation events. Also say the duration? Is this over an hour, a day, etc?

**“in one hour” was added to provide the appropriate detail.**

1. Say why you are using those K values. Also, did these vary by year?

**We chose those K values based on field observations. The MUSLE modeled watersheds were larger than the ERMiT watersheds (because we were looking at different metrics and different timescale...annual average sediment yield vs event-based sediment yield). The condition of the soil pre fire was sandy loam with a modeled K value of approximately 0.29. Post fire, we anticipated that the K value was ~0.80. Averaging these two balanced the initial condition vs the post-fire condition.**

1. Did your c value vary by year?

**No, it did not change by year because a) it is a dimensionless number used to denote a landscape scale practice (in this case it was forest area, doesn't change per MUSLE year to year)) and b) because we only completed MUSLE for current conditions as an event-based modeling method (not annual for multiple years.**

1. State error associated with photo measurements.

**The manuscript explains that these were qualitative assessments, there is no known error to the qualification nor are there repeatable confidence limits for this method. The landfill scale measurements were over several weeks and likewise do not have confidence intervals or a standard for error measurement.**

1. I think you actually need to describe the model details here. Is this just an equation, a numerical simulation, a spreadsheet with a GUI wrapper, something else? Show what calculations are being performed.

**This section has been expanded to describe the modeling technique and inputs.**

**The following was added to the manuscript:**

**“FLOWSED models the total annual sediment yield, both suspended and bedload, using flow-duration curves and their corresponding sediment yields. The dimensionless flow-duration curve is developed from representative watersheds**

**in the region using USGS stream gage data. The POWERSED model compares sediment transport in various configurations of channel geometry.”**

1. Say how FLOWSED/POWERSED estimates rebuilding of alluvial fans. What equations/methods are used to estimate deposition.

**FLOWSED/POWERSED are sediment supply and sediment transport models. They are used to determine the amount of sediment moved in a year by the channel. In this case a narrow, gully channel with no floodplain (existing condition) is compared to a valley wide channel (proposed alluvial fan). The difference in sediment transport is compared across these cross sections to show how the sediment transport competency changes with channel geometry.**

1. Where channel types updated? If they were not, why not?

**The channel types presented in Section 4.1 were assessed after the 2021 flood season and already account for changes in post-wildfire geomorphology.**

1. Sqy what you used to estimate the transport capacity and then how that was taken into account.

**This is addressed in previous comments on the FLOWSED/POWERSED modeling.**

1. You looked at 2021 but used 2022 modeled data. Explain why here.

**We took the current condition during the fieldwork period (Fall 2021) and used this period of time to model for 2022. The model uses the stream banks and hillslope in the current condition, considers average annual precipitation for the calendar year, and then models sediment output for a year. Since we completed the analysis and modeling in late fall 2021 (after the 2021 monsoon season), this analysis and modeled results are predictions for sedimentation for the entire 2022 winter runoff season and 2022 monsoon season. We didn't use other years (2019 or 2020) because we didn't have relevant field or geospatial data for these time frames.**

1. Change “calculates” to “estimates”

**Done**

1. Cite “a table or figure after “erosion rates.”

**Figure 7 and Figure 8 are provided, and cited, for displaying the data from this section.**

1. Say the reasoning behind the different precipitation events you modeled in the methods. Also, state why you didn't just use the observed precipitation.

**The reasoning has been explained in the Methods for each of the models as well as using the four observed flood events.**

330-331. Is this the full inventory of storms? I think you need to actually show the storms that occurred, and so I'd suggest creating a new figure showing that.

**A sentence was added to clarify that these storms were the only ones to generate flood runoff in 2021 within the study area.**

1. This sentence doesn't make sense here. Topic sentence of paragraph is about precipitation, but here you switch to a totally different topic of sediment removal.

**This sentence was moved to the next section on sediment transport and retention.**

1. here you are talking about a result, but you don't mention the mechanism that triggers more sediment retention?

**More description is added to this section.**

356-357. Here you talk about 2022 flow events. This makes me think that it might be helpful to have a timeline so we can better keep track of events that you are investigating.

**The sentence explains that the 2022 flow events were minor with no flooding. More context is added to this section. During the study there were only four large flood events, which are described in the manuscript.**

1. Sentence that starts with: "Observations on ..." doesn't seem relevant. What about this statement makes it go with the rest of the paragraph? It seems like a random statement about a different fire.

**Added context, the Pipeline Fire watersheds had similar sediment retention structure designs ("alluvial fan restorations" or "work areas").**

1. Here you start talking about the Pipeline fire again. But this is not mentioned in the study Site section or the methods. If you want to talk about it in the discussion, it needs to be introduced in those sections beforehand.

**The Pipeline Fire is not part of this study, discussion of a nearby fire, outside of the study, is appropriate in the Discussion section. Adding external discussion**

**pieces to the Study Site Section or Methods would not make sense. A description of the Pipeline Fire has been added to the Introduction.**

1. Did you see 1-2 orders of magnitude change in runoff? Say how your observations were similar or different than this prediction.

**Added a reference to hydrologic observations from the Museum Fire watershed.**

1. Reference a table or figure after 2021 on this line.

**The flooding events were described previously in the manuscript.**

1. Define “complacency”

**Complacency has been indirectly defined already in the Discussion, more information is available in the references provided (Stempniewicz 2014; Fulé et al. 2023).**

Be more specific about what empirical estimates and “other factors” you are talking about here.

**Unsure what specificity is requested. The sentence already provides the assumptions and unknowns that might lead to error: “Other factors likely include uncertainty in the empirical estimates (both over-estimating due to water volume in the sediment/debris loads as well as under-estimation due to floodplain areas not addressed by flood cleanup efforts), as well as WARSSS and WEPP model limitations for rill and gully erosion processes (hillslope incision).”**

420-421. You don’t talk about different channel designs in your methods so it is out of context to bring this in now.

**The Discussion section is the perfect location to provide a discussion of the results, techniques, and methods. The “Rosgen” style of channel design, also known as Natural Channel Design, is commonly used in the USA but is not without its controversy and detractors. Lines 420 through 429 provide discussion on the use of this channel classification and design method in this study and how it compares favorably with a more generic WEPP model as well as empirical results.**

1. What evidence suggests that the channels are evolving to a stable form?

**The sentence in line 435 is prefaced with the channel type and based on “natural channel design” process interpretation. A reference has been added to the appropriate paper explaining this process (Rosgen 2009).**

1. Here you suggest eliminating the gully, but one popular definition of a gully is that it is not a feature that can be easily reworked by machinery. Once established it is likely to come back.

**A sentence has been added explaining the use of rock sills as grade control to maintain the alluvial fan plan view (lines 457 to 459).**

1. Say the recurrence interval.

**Line 454 now explains that this a 4% annual exceedance probability**

### **Figures and Tables:**

Figure 1. Make the tick labels bigger. If you are running out of room on the latitude tick labels, you can rotate them. Label Spruce Wash. Use a (b) to label and refer to the inset. And in the inset say what the shapes represent, I assume they are county boundaries? Add a polygon showing the fire perimeter. Also the line type for the forest boundary and Mt. Elden Lookout road are difficult to distinguish.

**Figure 1 has been updated.**

Figure 3. I think figure 3 can be combined with figure 1 because most of the information is the same. Also, I see some cross sections near the label for "Lower North Trib" that aren't crossing the stream lines. Why is that?

**We left Figure 3 in "as-is" since it would make Figure 1 very busy and difficult to read to add the cross-sections on top of the other neighborhood labels and delineations of the sub-watersheds. The cross sections may not line up with the stream lines if the National Hydrography Dataset (NHD) has mapping errors. The NHD is the base layer for the stream lines shapefile.**

Figure 4. Can you put the alphabetical labels close to some of the stream segments on the map to better see how the segments are related to the legend?

**We have updated the figure.**

Figure 5. Say what sets the categories for unit erosion

**Unsure what the reviewer is asking for, the units are presented in the figure and the figure legend.**



Figure 7. The labels in Figure 7a are too small. In caption, consider changing “major channels” to “tributaries”

**This figure has been improved accordingly.**

Figure 8. In the caption say why you chose the 100 year forecasted hillslope annual yield

**This is a common WEPP model output and is explained in the WEPP model literature cited in this manuscript.**

Figure 9. Your arrow is attempting to indicate two things. So I suggest you actually swap the vertical error for a vertical bar. Then have a horizontal arrow going in one direction to indicate 6260 Mg before August 17, and a second horizontal arrow in the opposite direction to indicate 3760 Mg after August 17.

**Unsure of what the request is for this figure. The current figure shows the amount of sediment removed from the neighborhoods by day and also delineates the difference between the first three storms and the larger August storm.**

Figure 10. make a figure 10 showing the observed precipitation.

**The four flood events are described in the manuscript, a more in-depth discussion is provided in the cited hydrology report (Schenk et al. 2023). The study area is in a semi-arid climate with infrequent rain and flow events. Flow events that did not trigger a flood are extremely minor with little sediment mobilization.**

Table1. Add name of model in column labels

**The model used for each column is already expressed in the table caption. Adding this detail, and another explanation, in the table would be duplicative and make the table less concise.**

Table 2. Put the K value in the column titles.

**Added:**

**K-Values:**

**Low K: 0.29 (sandy loam)**

**Medium K: 0.545 (sandy loam + high burn)**

**High K: 0.80 (High burn severity K Value)**

Table 3. Indicate a column title for the last unlabeled column

**The header has been fixed**
